# Supplementary material
Source: Springer Nature journal article supplement (https://www.springermedizin.de/resource/supplementary/12911_2007_171_MOESM3_ESM.pdf/9527290)

# Total validation group

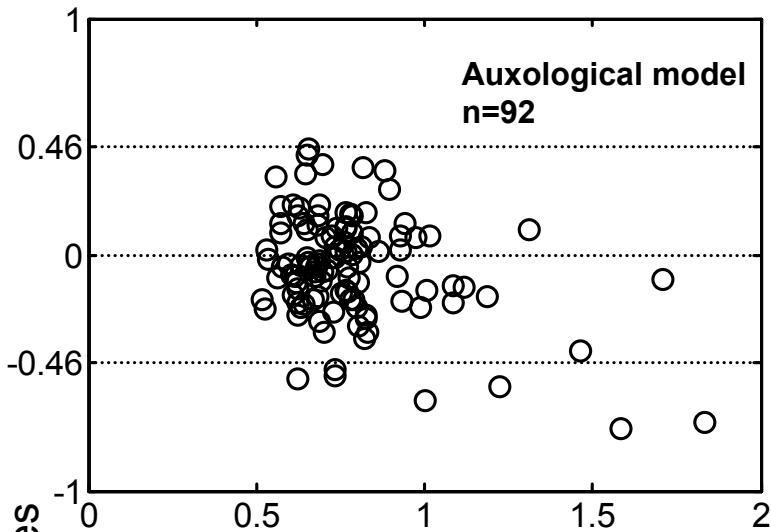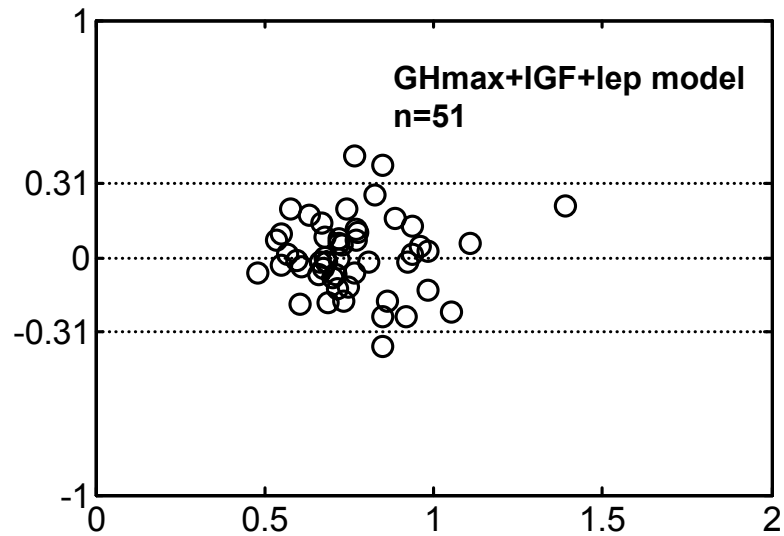

# SGA validation group

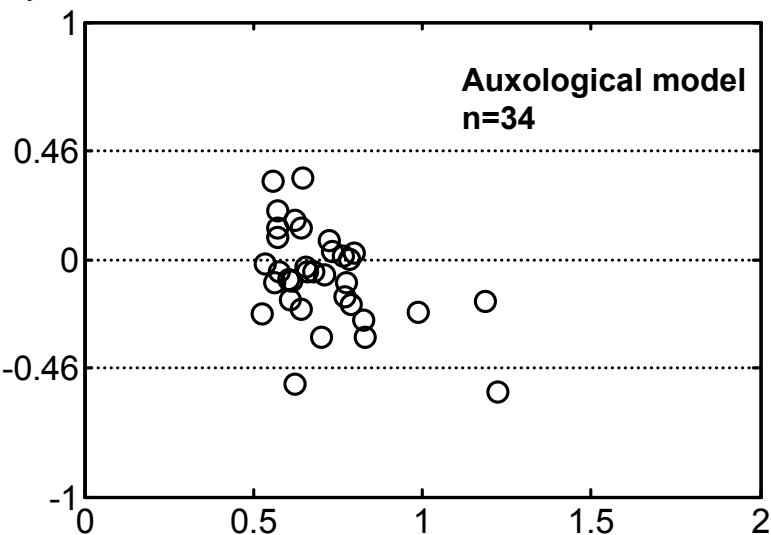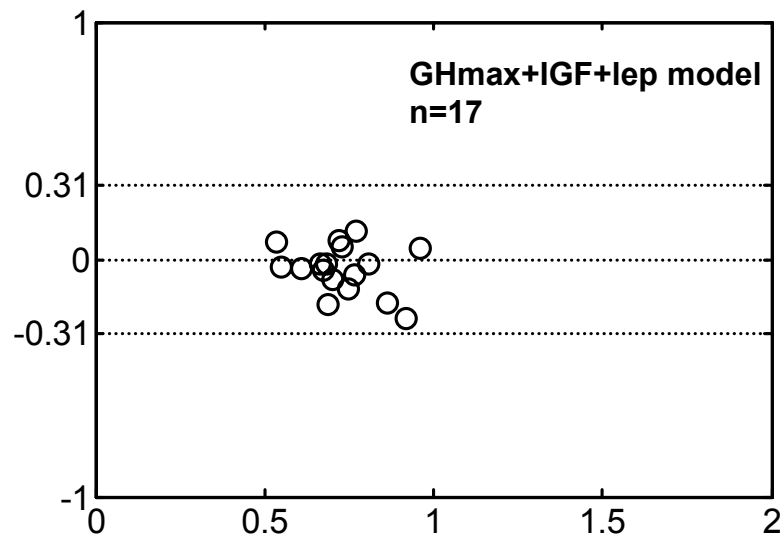

Predicted 1st year change in height SDS

Supplement: MOESM3 [file 9527290]
